# Supplementary material for: Association between the Desire for Breast Augmentation and Instagram Engagement: A Cross-Sectional Survey among Young Polish Women
Source: MDPI journal article supplement (doi:10.3390/ijerph181910317), 2021-09-30
Supplement: s1 [file s1]

## Supplementary Material

Title: Association between breast augmentation desire and Instagram engagement: a cross-sectional survey among young Polish women

**Table S1.** Questions on willingness to undergo breast augmentation surgery and emotions triggered by Instagram content concerning the past week.

| Willingness to undergo breast augmentation surgery                                    |                   |                       |                   |                                    |
|---------------------------------------------------------------------------------------|-------------------|-----------------------|-------------------|------------------------------------|
| Please address the following statements                                               | disagree          | somewhat agree        | definitely agree  |                                    |
| I think the surgery would be a good experience.                                       | 0                 | 1                     | 2                 |                                    |
| The surgery would change my life for the better.                                      | 0                 | 1                     | 2                 |                                    |
| I do not feel that I need surgery to improve my breasts' look.                        | 2                 | 1                     | 0                 |                                    |
| My breasts are the perfect size for me.                                               | 2                 | 1                     | 0                 |                                    |
| My breasts perfectly match my expectation.                                            | 2                 | 1                     | 0                 |                                    |
| Positive emotions                                                                     | None of the time? | A little of the time? | Some of the time? | Most of the time? All of the time? |
| Concerning period of past week and watched Instagram content, how often did you feel? |                   |                       |                   |                                    |
| Beautiful?                                                                            | 1                 | 2                     | 3                 | 4 5                                |
| Admired by others?                                                                    | 1                 | 2                     | 3                 | 4 5                                |
| Attractive?                                                                           | 1                 | 2                     | 3                 | 4 5                                |
| Equally worth as other women?                                                         | 1                 | 2                     | 3                 | 4 5                                |
| Negative emotions                                                                     | None of the time? | A little of the time? | Some of the time? | Most of the time? All of the time? |
| Concerning period of past week and watched Instagram content, how often did you feel? |                   |                       |                   |                                    |
| Average?                                                                              | 1                 | 2                     | 3                 | 4 5                                |
| Unpopular?                                                                            | 1                 | 2                     | 3                 | 4 5                                |
| Ugly?                                                                                 | 1                 | 2                     | 3                 | 4 5                                |
| Worse than other women?                                                               | 1                 | 2                     | 3                 | 4 5                                |

**Table S2a.** Demographic characteristic of respondents (N=1226).

| Variable                |                               | n    | %N    | Augmentation Score (n) |         |
|-------------------------|-------------------------------|------|-------|------------------------|---------|
|                         |                               |      |       | ≤Median                | >Median |
| Age                     | 19-25                         | 1093 | 89.15 | 619                    | 474     |
|                         | 26-34                         | 133  | 10.85 | 71                     | 62      |
|                         |                               |      |       |                        |         |
| BMI                     | <18.5                         | 171  | 13.95 | 86                     | 85      |
|                         | 18.5-25.0                     | 886  | 72.27 | 527                    | 359     |
|                         | >25.0                         | 169  | 13.78 | 77                     | 92      |
|                         |                               |      |       |                        |         |
| Education               | Elementary school             | 38   | 3.10  | 22                     | 16      |
|                         | Secondary school              | 248  | 20.23 | 122                    | 126     |
|                         | Undergraduate student         | 269  | 21.94 | 150                    | 119     |
|                         | Professional school student   | 463  | 37.77 | 278                    | 185     |
|                         | Bachelor's degree             | 91   | 7.42  | 52                     | 39      |
|                         | Master's degree               | 110  | 8.97  | 62                     | 48      |
|                         | Doctor of Philosophy          | 7    | 0.57  | 4                      | 3       |
| Marital status          | Single                        | 333  | 27.16 | 177                    | 156     |
|                         | Living with significant other | 716  | 58.40 | 409                    | 307     |
|                         | Married                       | 80   | 6.53  | 51                     | 29      |
|                         | Alone                         | 95   | 7.75  | 51                     | 44      |
|                         | Divorced                      | 2    | 0.16  | 2                      | 0       |
| Monthly personal income |                               |      |       |                        |         |
|                         | <375 USD                      | 870  | 70.96 | 490                    | 380     |

|                              |                   |      |       |     |     |
|------------------------------|-------------------|------|-------|-----|-----|
|                              | 375-1125 USD      | 320  | 26.10 | 180 | 140 |
|                              | >1125 USD         | 36   | 2.94  | 20  | 16  |
| Population of inhabited city |                   |      |       |     |     |
|                              | 500.000-1.000.000 | 608  | 49.59 | 355 | 253 |
|                              | 250.000-500.000   | 170  | 13.87 | 94  | 76  |
|                              | 100.000-250.000   | 99   | 8.08  | 50  | 49  |
|                              | 10.000-100.000    | 187  | 15.25 | 99  | 88  |
|                              | <10.000           | 95   | 7.75  | 52  | 43  |
|                              | <1.000            | 67   | 5.46  | 40  | 27  |
| Long-term health condition   |                   |      |       |     |     |
|                              | Yes               | 453  | 36.95 | 257 | 196 |
|                              | No                | 773  | 63.05 | 433 | 340 |
| Size of bra cup              |                   |      |       |     |     |
|                              | A                 | 151  | 12.32 | 45  | 106 |
|                              | B                 | 410  | 33.44 | 277 | 183 |
|                              | C                 | 293  | 23.90 | 185 | 108 |
|                              | D                 | 179  | 14.60 | 123 | 56  |
|                              | >D                | 193  | 15.74 | 110 | 83  |
| Bra type                     |                   |      |       |     |     |
|                              | Full-cup          | 365  | 29.77 | 213 | 152 |
|                              | Half-cup          | 348  | 28.38 | 226 | 122 |
|                              | Push-up           | 285  | 23.25 | 102 | 183 |
|                              | Sporty            | 63   | 5.14  | 44  | 19  |
|                              | Balconette        | 62   | 5.06  | 39  | 23  |
|                              | Other             | 103  | 8.40  | 66  | 37  |
| Active Instagram account     |                   |      |       |     |     |
|                              | Yes               | 1050 | 85.64 | 575 | 475 |
|                              | No                | 176  | 14.36 | 115 | 61  |

Table S2b. BREAST Q and Augmentation score results.

| Variable                       | n    | Mean  | SD    |
|--------------------------------|------|-------|-------|
| Psychosocial Well-Being Score  | 1226 | 61.97 | 19.38 |
| Sexual Well-Being Score        | 1226 | 55.8  | 21.35 |
| Satisfaction with Breast Score | 1226 | 53.7  | 15.77 |
| Augmentation score             | 1226 | 0.69  | 0.59  |

**Text S1.** Research survey.

Research survey, overall 37 items, average time 7 min 20 sec.

**General component** (18 items)

Demographic section (12 items)

1. How old are you? Please enter your age.
2. What is your height? Please enter your height (in cm).
3. How much do you weigh? Please enter your weight (in kg).
4. What is your nationality?
  - a) Polish
  - b) Ukrainian
  - c) Russian
  - d) other
5. Your education level is:
  - a) Elementary school
  - b) Secondary school
  - c) Undergraduate student
  - d) Bachelor's degree
  - e) Professional school student
  - f) Master's degree
  - g) Doctor of Philosophy
6. Your marital status? What definition does suit you the best?
  - a) Alone (never married or in relationship)
  - b) Living with significant other
  - c) Married
  - d) Divorced
  - e) Widowed
  - f) Other (e.g.: separated)
7. What is your monthly personal income?
  - a) Less than 1500PLN(375USD)
  - b) From 1500PLN to 4500PLN (375-1125USD)
  - c) More than 4500 PLN(1125USD)
8. What is the population of the city you live in?
  - a) Town under 1 thousand (K)
  - b) Town under 10 K
  - c) 10K- 100K (e.g: Legnica, Leszno)
  - d) 100K-250K (e.g: Sosnowiec, Zabrze)
  - e) 500K - 1mln (e.g: Warszawa, Kraków, Łódź, Poznań, Wrocław)
9. Do you suffer from chronic diseases?
  - a) Yes
  - b) No
10. What is bra cup size you wear on daily basis?
  - a) A
  - b) B
  - c) C
  - d) D
  - e) >D
11. What type of bra do you wear most often?
  - a) balconette (lowered cup, cut nearly horizontally)
  - b) push up
  - c) full cup

- d) half-cup
- e) sports bra
- f) other

12. Do you have children?

- a) I do not have children
- b) one
- c) two
- d) more than two

#### BREAST Q section.

In this section three parts of BREAST-Q version 2.0© Augmentation Module, Polish (PL) Version: PSYCHOSOCIAL WELL-BEING, SEXUAL WELL-BEING, and BREAST SATISFACTION were utilized.

#### Examination of respondent willingness to undergo breast augmentation. (5 items)

We would like to know your opinion on the breast augmentation surgery. Please indicate to what extent you agree or disagree with following statements.

---

"Concerning period of past week, please address following statements"   disagree   somewhat agree   definitely agree

|                                                                 |   |   |   |
|-----------------------------------------------------------------|---|---|---|
| "I think, the surgery would be a good experience"               | 0 | 1 | 2 |
| "The surgery would change my life for the better"               | 0 | 1 | 2 |
| "I do not feel that I need surgery to improve my breasts' look" | 2 | 1 | 0 |
| "My breasts are the perfect size for me"                        | 2 | 1 | 0 |
| "My breasts perfectly match my expectation"                     | 2 | 1 | 0 |

---

Self-classification question

Do you have an active Instagram account, that was used in the past week?

- a) Yes, I used it over the past week
- b) No

**Instagram focused part – available only to self-classified active Instagram users. (19 items)**

Apart from Instagram, what social media platforms do you use?

- a) Facebook
- b) YouTube
- c) Twitter
- d) Snapchat
- e) TikTok
- f) Pinterest
- g) Other

How much time do you spent on Instagram, daily?

- a) Less than 30min a day
- b) 0,5-1h a day
- c) 1-2h a day
- d) More than 2h a day

On Instagram I search for content in the following categories: (multiple choice)

- a) Friends
- b) Fashion
- c) Travelling
- d) Food
- e) Design/Architecture
- f) Models
- g) Celebrities
- h) Inspiration
- i) Wildlife
- j) Other

Instagram habits & preferences (7 items)

We would like to get to know your preferences regarding Instagram. Please indicate to what extent you agree or disagree with following statements.

|                                                                                       |          |                |                  |
|---------------------------------------------------------------------------------------|----------|----------------|------------------|
| Instagram is portal where I publish the most of my photos.                            | disagree | somewhat agree | definitely agree |
| I publish photos with use in-app filters or other digital image enhancing techniques. | disagree | somewhat agree | definitely agree |
| Make-up wear is necessary for perfect Instagram photography.                          | disagree | somewhat agree | definitely agree |
| My face is fully visible on my published photos.                                      | disagree | somewhat agree | definitely agree |
| I publish photos with exposed neckline.                                               | disagree | somewhat agree | definitely agree |
| I think I could publish naked photos.                                                 | disagree | somewhat agree | definitely agree |
| I often ask person with experience in professional photography for help.              | disagree | somewhat agree | definitely agree |

How are you popular on Instagram? Please enter your account details.

- a) Number of published posts
- b) Number of followers

c) Number of followed accounts

Feelings triggered by watched Instagram content. (8items)

Concerning period of past week and watched Instagram content, how often did you feel?

|                                  | None of the<br>time? | A little of the<br>time? | Some of the<br>time? | Most of the<br>time? | All of the<br>time? |
|----------------------------------|----------------------|--------------------------|----------------------|----------------------|---------------------|
| Beautiful?                       | 1                    | 2                        | 3                    | 4                    | 5                   |
| Admired by others?               | 1                    | 2                        | 3                    | 4                    | 5                   |
| Attractive?                      | 1                    | 2                        | 3                    | 4                    | 5                   |
| Equally worth as other<br>women? | 1                    | 2                        | 3                    | 4                    | 5                   |
| Average?                         | 1                    | 2                        | 3                    | 4                    | 5                   |
| Unpopular?                       | 1                    | 2                        | 3                    | 4                    | 5                   |
| Ugly?                            | 1                    | 2                        | 3                    | 4                    | 5                   |
| Worse than other women?          | 1                    | 2                        | 3                    | 4                    | 5                   |
